# Supplementary material for: Risk Factors for Retinopathy in Type 1 Diabetes: The DCCT/EDIC Study
Source: Oxford University Press journal article supplement (doi:10.2337/dc18-2308), 2019-03-04

## SUPPLEMENTARY DATA

### **Risk Factors for Retinopathy in Type 1 Diabetes**

The Diabetes Control and Complications Trial (DCCT)-Epidemiology of Diabetes Interventions and Complications (EDIC) Research Group\*

\*A complete list of participants in the DCCT-EDIC Research Group is presented in the Supplementary Material published online for the article in *N Engl J Med* 2015;372:1722-33.

#### **Writing Group:**

Hainsworth DP (chair), Bebu I, Aiello LP, Sivitz W, Gubitosi-Klug R, Malone J, White NH, Danis R, Wallia A, Gao X, Barkmeier AJ, Das A, Patel S, Gardner TW, Lachin JM

This Appendix presents supplemental materials cited in the text of the main manuscript.

SUPPLEMENTARY DATA

**Supplementary Table S1. Risk factors (by block) employed in the analyses with a description of availability.**

| <b>Block</b>                   | <b>Variable</b>                           | <b>Availability*</b>               |
|--------------------------------|-------------------------------------------|------------------------------------|
| <b><u>DESIGN</u></b>           |                                           |                                    |
|                                | Cohort                                    | B                                  |
|                                | Treatment Group                           | B                                  |
| <b><u>DEMOGRAPHIC</u></b>      |                                           |                                    |
| <b>Physical</b>                | Sex (male versus female)                  | B                                  |
|                                | Age (yr)                                  | B                                  |
|                                | Adult                                     | B                                  |
|                                | Weight (kg)                               | B, C <sup>†</sup> , M <sup>†</sup> |
|                                | Weight Gain (kg)                          | C <sup>†</sup>                     |
|                                | Body mass index (kg/m <sup>2</sup> )      | B, C <sup>†</sup> , M <sup>†</sup> |
| <b>Behavioral</b>              | Current cigarette smoker                  | B, C <sup>†</sup>                  |
|                                | Occasional or regular drinker             | B, C <sup>†</sup>                  |
|                                | Moderate or strenuous activity            | B, C <sup>†</sup>                  |
| <b>Family History</b>          | Family history                            |                                    |
|                                | Hypertension                              | B                                  |
|                                | Myocardial infarction (MI)                | B                                  |
|                                | Type 1 Diabetes                           | B                                  |
|                                | Type 2 Diabetes                           | B                                  |
| <b><u>TRADITIONAL</u></b>      |                                           |                                    |
| <b>Blood pressure</b>          | Systolic (mm Hg)                          | B, C <sup>†</sup> , M <sup>†</sup> |
|                                | Diastolic (mm Hg)                         | B, C <sup>†</sup> , M <sup>†</sup> |
|                                | Pulse pressure (mm Hg)                    | B, C <sup>†</sup>                  |
|                                | Pulse rate (bpm)                          | B, C <sup>†</sup> , M <sup>†</sup> |
|                                | Hypertension (≥140/90 or medication)      | B, C <sup>†</sup> , A <sup>†</sup> |
| <b>Medications</b>             | ACE                                       | C <sup>‡</sup>                     |
|                                | ARB                                       | C <sup>‡</sup>                     |
|                                | Beta Blockers                             | C <sup>‡</sup>                     |
|                                | Calcium Channel Blockers                  | C <sup>‡</sup>                     |
|                                | Lipid Lowering                            | C <sup>‡</sup>                     |
| <b>Lipids</b>                  | Total cholesterol (mg/dl)                 | B, C <sup>§</sup> , M <sup>§</sup> |
|                                | Triglycerides (mg/dl)                     | B, C <sup>§</sup> , M <sup>§</sup> |
|                                | HDL cholesterol (mg/dl)                   | B, C <sup>§</sup> , M <sup>§</sup> |
|                                | LDL cholesterol (mg/dl)                   | B, C <sup>§</sup> , M <sup>§</sup> |
|                                | Hyperlipidemia (LDLc > 130 or medication) | B, C <sup>§</sup>                  |
| <b><u>DIABETES-RELATED</u></b> |                                           |                                    |
| <b>History</b>                 | Duration of diabetes (yr)                 | B                                  |
|                                | Stimulated C-peptide (nmol/L)             | B                                  |
|                                | Duration <60 months                       |                                    |
|                                | Duration ≥60 months                       |                                    |
|                                | Insulin dose (units/kg/day)               | B, C <sup>†</sup> , M <sup>†</sup> |
|                                | eGlucose Disposal Rate                    | C <sup>‡</sup>                     |
| <b>Microvascular</b>           | Nephropathy                               | B                                  |
|                                | eGFR (mL/min per 1.73 m <sup>2</sup> )    | B, C <sup>†</sup>                  |

SUPPLEMENTARY DATA

|                     |                             |                                    |
|---------------------|-----------------------------|------------------------------------|
|                     | eGFR<60                     | C <sup>†</sup> , A <sup>†</sup>    |
|                     | AER (mg/24 hr)              | B, C <sup>§</sup> ,                |
|                     | AER ≥40, AER≥300, Sustained | A <sup>§</sup>                     |
|                     | AER≥30mg/24 hr              |                                    |
| <b>Hypoglycemia</b> | Coma and/or seizure         | B, C <sup>†</sup>                  |
|                     | Requiring assistance        | B, C <sup>†</sup>                  |
| <b>Glycemia</b>     | HbA1c (%)                   | B, C <sup>†</sup> , M <sup>†</sup> |

\*B=Baseline Value, C=Current Value, M=Updated Mean Value, A=Cumulative Incidence (such as Any Use). Categories C, M and A enter the analyses as time dependent covariates.

<sup>†</sup>Collected annually during DCCT and EDIC;

<sup>‡</sup> Collected Annually in EDIC, not collected in DCCT;

<sup>§</sup> Collected annually in DCCT, every two years in EDIC

SUPPLEMENTARY DATA

**Supplementary Table S2.** Baseline Characteristics of DCCT/EDIC Participants According to the Presence or Absence of CSME over the Course of the DCCT/EDIC Study

|                                  | Overall    | Any CSME   |            | HR    | 95% CI         | p-value           |
|----------------------------------|------------|------------|------------|-------|----------------|-------------------|
|                                  |            | No         | Yes        |       |                |                   |
| N                                | 1440       | 1009       | 431        |       |                |                   |
| Treatment group (% conventional) | 51         | 46         | 61         | 1.763 | (1.453, 2.14)  | <b>&lt;0.0001</b> |
| Cohort (% secondary)             | 50         | 45         | 60         | 1.652 | (1.361, 2.005) | <b>&lt;0.0001</b> |
| Sex (% males)                    | 53         | 51         | 58         | 1.331 | (1.099, 1.612) | <b>0.0034</b>     |
| Age (yr)                         | 27 (22,32) | 27 (22,32) | 28 (22,33) | 1.017 | (1.004, 1.031) | <b>0.0129</b>     |
| Adult vs. adolescent             | 86         | 87         | 86         | 1.041 | (0.791, 1.371) | 0.7736            |
| Weight Males (kg)                | 75 (68,82) | 74 (68,82) | 76 (67,83) | 1.009 | (0.997, 1.021) | 0.1245            |
| Weight Females (kg)              | 62 (56,69) | 61 (56,68) | 64 (58,70) | 1.023 | (1.007, 1.039) | <b>0.0042</b>     |
| BMI Males (kg/m <sup>2</sup> )   | 24 (22,25) | 23 (22,25) | 24 (22,26) | 1.077 | (1.028, 1.129) | <b>0.0019</b>     |
| BMI Females (kg/m <sup>2</sup> ) | 23 (21,25) | 23 (21,25) | 24 (22,26) | 1.089 | (1.036, 1.145) | <b>0.0009</b>     |
| Smoking (%)                      | 18         | 18         | 19         | 1.096 | (0.861, 1.396) | 0.4573            |
| Drinking (% occasional or        | 29         | 28         | 32         | 1.225 | (1.001, 1.498) | <b>0.0488</b>     |

SUPPLEMENTARY DATA

|                                    |               |               |               |       |                |                   |
|------------------------------------|---------------|---------------|---------------|-------|----------------|-------------------|
| regular)                           |               |               |               |       |                |                   |
| Exercise (% moderate or strenuous) | 82            | 82            | 81            | 0.924 | (0.728, 1.172) | 0.5131            |
| Family history of HT (%)           | 56            | 55            | 58            | 1.124 | (0.928, 1.361) | 0.2315            |
| Family history of MI (%)           | 49            | 48            | 50            | 1.022 | (0.846, 1.235) | 0.8205            |
| Family history of T1D (%)          | 14            | 13            | 17            | 1.326 | (1.034, 1.701) | <b>0.0264</b>     |
| Family history of T2D (%)          | 9             | 9             | 10            | 1.187 | (0.869, 1.622) | 0.2803            |
| Systolic BP (mm Hg)                | 114 (108,122) | 112 (106,122) | 116 (110,124) | 1.014 | (1.005, 1.022) | <b>0.0016</b>     |
| Diastolic BP (mm Hg)               | 72 (68,80)    | 72 (68,78)    | 74 (70,81)    | 1.027 | (1.015, 1.039) | <b>&lt;0.0001</b> |
| Pulse pressure (mm Hg)             | 40 (36,48)    | 40 (36,48)    | 40 (36,48)    | 0.999 | (0.989, 1.009) | 0.8022            |
| Pulse (bpm)                        | 76 (68,84)    | 76 (68,82)    | 76 (68,84)    | 1.014 | (1.006, 1.023) | <b>0.0007</b>     |
| Hypertension (%)                   | 3             | 2             | 3             | 1.443 | (0.831, 2.506) | 0.1930            |
| Total cholesterol (mg/dl)          | 174 (153,196) | 172 (152,194) | 177 (155,204) | 1.006 | (1.003, 1.009) | <b>&lt;0.0001</b> |
| Triglycerides                      | 73 (55,93)    | 71 (53,91)    | 79 (60,98)    | 1.67  | (1.361, 2.048) | <b>&lt;0.0001</b> |

SUPPLEMENTARY DATA

|                                      |               |                |                |       |                |                   |
|--------------------------------------|---------------|----------------|----------------|-------|----------------|-------------------|
| (mg/dl)                              |               |                |                |       |                |                   |
| HDLc (mg/dl)                         | 49 (42,57)    | 50 (42,58)     | 48 (42,57)     | 0.997 | (0.989, 1.004) | 0.3952            |
| LDLc (mg/dl)                         | 107 (91,127)  | 105 (89,125)   | 110 (94,130)   | 1.006 | (1.003, 1.01)  | <b>0.0001</b>     |
| Duration of Diabetes (years)         | 4.3 (2.3,9.1) | 3.9 (2.2, 8.7) | 5.2 (2.9, 10)  | 1.061 | (1.036, 1087)  | <b>&lt;0.0001</b> |
| 100*C-peptide duration<5yrs (nmol/L) | 13 (4,25)     | 13 (4,25)      | 11 (4,26)      | 0.998 | (0.988, 1.009) | 0.7300            |
| 100*C-peptide duration>5yrs (nmol/L) | 3 (3,4)       | 3 (3,4)        | 3 (3,4)        | 0.998 | (0.963, 1.034) | 0.9037            |
| Log AER (mg/24 hr)                   | 2.4 (2.0,2.9) | 2.3 (1.8,2.8)  | 2.6 (2.0,3.1)  | 1.307 | (1.164, 1.468) | <b>&lt;0.0001</b> |
| HbA1c (%)                            | 8.7 (7.8,9.9) | 8.5 (7.6,9.6)  | 9.2 (8.1,10.4) | 1.244 | (1.178, 1.314) | <b>&lt;0.0001</b> |

Included in this table are 1440 patients who had at least 2 fundus photographs.

HT=hypertension; T1D=type 1 diabetes; T2D=type 2 diabetes; BP=blood pressure; ACE=angiotensin converting enzyme inhibitors; ARB=angiotensin receptor blockers; HDL=high-density lipoprotein; LDL=low-density lipoprotein; eGDR=estimated glucose disposal rate; eGFR=estimated glomerular filtration rate; AER=albumin excretion rate; HR=hazard ratio; CI=confidence interval.

Data are medians (first quartile, third quartile) or %. Hazard ratios (HR) and p-values are generated using a Cox Proportional hazards model.

SUPPLEMENTARY DATA

**Supplementary Table S3.** Baseline Characteristics of DCCT/EDIC Participants According to the Presence or Absence of Ocular Surgery over the Course of the DCCT/EDIC Study

|                                    | Any Ocular Surgery |            |            | HR    | 95% CI         | p-value           |
|------------------------------------|--------------------|------------|------------|-------|----------------|-------------------|
|                                    | Overall            | No         | Yes        |       |                |                   |
| N                                  | 1439               | 1158       | 281        |       |                |                   |
| Treatment group (%conventional)    | 51                 | 48         | 60         | 1.654 | (1.302, 2.1)   | <b>&lt;0.0001</b> |
| Cohort (% secondary)               | 50                 | 46         | 63         | 1.608 | (1.26, 2.053)  | <b>0.0001</b>     |
| Sex (% males)                      | 53                 | 54         | 47         | 0.817 | (0.646, 1.033) | 0.0917            |
| Age (yr)                           | 27 (22,32)         | 27 (22,32) | 30 (24,34) | 1.048 | (1.03, 1.067)  | <b>&lt;0.0001</b> |
| Adult vs. adolescent               | 86                 | 86         | 87         | 1.149 | (0.811, 1.628) | 0.4341            |
| Weight Males (kg)                  | 75 (68,82)         | 74 (67,82) | 76 (70,85) | 1.016 | (1.000, 1.031) | <b>0.0498</b>     |
| Weight Females (kg)                | 62 (56,69)         | 61 (56,68) | 64 (58,70) | 1.025 | (1.007, 1.042) | <b>0.0048</b>     |
| BMI Males (kg/m <sup>2</sup> )     | 24 (22,25)         | 23 (22,25) | 24 (22,26) | 1.078 | (1.013, 1.147) | <b>0.0179</b>     |
| BMI Females (kg/m <sup>2</sup> )   | 23 (21,25)         | 23 (21,25) | 24 (22,25) | 1.078 | (1.022, 1.137) | <b>0.0061</b>     |
| Smoking (%)                        | 18                 | 17         | 22         | 1.426 | (1.077, 1.889) | <b>0.0131</b>     |
| Drinking (% occasional or regular) | 29                 | 29         | 30         | 1.073 | (0.831, 1.384) | 0.5888            |
| Exercise (% moderate or strenuous) | 82                 | 82         | 79         | 0.825 | (0.619, 1.099) | 0.1891            |
| Family history of HT (%)           | 56                 | 55         | 60         | 1.209 | (0.952, 1.536) | 0.1191            |
| Family history of MI (%)           | 49                 | 48         | 51         | 1.077 | (0.852, 1.362) | 0.5341            |
| Family history of T1D (%)          | 14                 | 13         | 17         | 1.302 | (0.957, 1.772) | 0.0934            |
| Family history of T2D (%)          | 9                  | 8          | 12         | 1.419 | (0.987, 2.041) | 0.0590            |

SUPPLEMENTARY DATA

|                                      |               |               |                |       |                |                   |
|--------------------------------------|---------------|---------------|----------------|-------|----------------|-------------------|
| Systolic BP (mm Hg)                  | 114 (108,122) | 114 (108,122) | 114 (108,122)  | 1.003 | (0.993, 1.013) | 0.5885            |
| Diastolic BP (mm Hg)                 | 72 (68,80)    | 72 (68,80)    | 74 (68,80)     | 1.011 | (0.997, 1.025) | 0.1211            |
| Pulse pressure (mm Hg)               | 40 (36,48)    | 40 (36,48)    | 40 (36,46)     | 0.995 | (0.983, 1.008) | 0.4628            |
| Pulse (bpm)                          | 76 (68,84)    | 76 (68,82)    | 80 (72,84)     | 1.019 | (1.009, 1.029) | <b>0.0002</b>     |
| Hypertension (%)                     | 3             | 2             | 4              | 1.443 | (0.767, 2.713) | 0.2554            |
| Total cholesterol (mg/dl)            | 174 (153,196) | 173 (152,196) | 176 (156,200)  | 1.003 | (1.000, 1.007) | 0.0894            |
| Triglycerides (mg/dl)                | 73 (55,93)    | 72 (54,92)    | 77 (58,100)    | 1.376 | (1.065, 1.777) | <b>0.0145</b>     |
| HDLc (mg/dl)                         | 49 (42,58)    | 49 (42,57)    | 48 (42,58)     | 1.002 | (0.993, 1.012) | 0.6412            |
| LDLc (mg/dl)                         | 107 (91,127)  | 106 (90,127)  | 110 (94,127)   | 1.003 | (0.999, 1.007) | 0.2098            |
| Duration of Diabetes (years)         | 4.3 (2.3,9.1) | 4 (2.3, 8.7)  | 6.3 (3.3,10.9) | 1.061 | (1.036, 1.100) | <b>&lt;0.0001</b> |
| 100*C-peptide duration<5yrs (nmol/L) | 12 (4,25)     | 13 (4,25)     | 10 (4,24)      | 0.992 | (0.979, 1.006) | 0.2662            |
| 100*C-peptide duration>5yrs (nmol/L) | 3 (3,4)       | 3 (3,4)       | 3 (3,3)        | 0.985 | (0.941, 1.031) | 0.5038            |
| Log AER (mg/24 hr)                   | 2.4 (2.0,2.9) | 2.4 (2.0,2.8) | 2.4 (2.0,3.0)  | 1.108 | (0.958, 1.283) | 0.1675            |
| HbA1c (%)                            | 8.7 (7.8,9.9) | 8.5 (7.7,9.7) | 9.2 (8.2,10.2) | 1.228 | (1.147, 1.314) | <b>&lt;0.0001</b> |

Included in this table are 1439 patients who had at least 2 visual acuity evaluations.

HT=hypertension; T1D=type 1 diabetes; T2D=type 2 diabetes; BP=blood pressure; ACE=angiotensin converting enzyme inhibitors; ARB=angiotensin receptor blockers; HDL=high-density lipoprotein; LDL=low-density lipoprotein; eGDR=estimated glucose disposal rate; eGFR=estimated glomerular filtration rate; AER=albumin excretion rate; HR=hazard ratio; CI=confidence interval.

Data are medians (first quartile, third quartile) or %. Hazard ratios (HR) and p-values are generated using a Cox Proportional hazards model



SUPPLEMENTARY DATA

**Supplementary Table S4.** Hazard ratios for PDR per unit change in each time-dependent covariate with no adjustment, adjusted for age and adjusted for age and mean HbA1c

|                       | Unadjusted |        |        |               | Adjusted for Age |        |        |               | Adjusted for Age and mean HbA1c |        |        |               |
|-----------------------|------------|--------|--------|---------------|------------------|--------|--------|---------------|---------------------------------|--------|--------|---------------|
|                       | HR         | LL     | UL     | p-value       | HR               | LL     | UL     | p-value       | HR                              | LL     | UL     | p-value       |
| Treatment group       | 2.1509     | 1.7413 | 2.6570 | <0.0001       | 2.1385           | 1.7306 | 2.6427 | <0.0001       | 0.8794                          | 0.6953 | 1.1122 | 0.2837        |
| Cohort                | 2.1576     | 1.7428 | 2.6712 | <0.0001       | 2.1850           | 1.7641 | 2.7065 | <0.0001       | 2.7107                          | 2.1848 | 3.3631 | <0.0001       |
| Sex                   | 1.1034     | 0.9014 | 1.3506 | 0.3401        | 1.1148           | 0.9102 | 1.3653 | 0.2933        | 1.1092                          | 0.9050 | 1.3593 | 0.3178        |
| Age                   | 0.9904     | 0.9765 | 1.0045 | 0.1825        | -                | -      | -      | -             | -                               | -      | -      | -             |
| Adult vs. adolescent  | 0.8210     | 0.6246 | 1.0793 | 0.1577        | 0.8820           | 0.6025 | 1.2910 | 0.5184        | 1.5370                          | 1.0427 | 2.2656 | <b>0.0299</b> |
| Weight                | 0.9942     | 0.9876 | 1.0009 | 0.0947        | 0.9946           | 0.9880 | 1.0014 | 0.1214        | 0.9974                          | 0.9906 | 1.0042 | 0.4551        |
| BMI                   | 0.9833     | 0.9601 | 1.0071 | 0.1681        | 0.9839           | 0.9607 | 1.0076 | 0.1832        | 0.9980                          | 0.9747 | 1.0219 | 0.8723        |
| Mean weight           | 0.9977     | 0.9900 | 1.0055 | 0.5752        | 0.9985           | 0.9907 | 1.0064 | 0.7251        | 1.0004                          | 0.9924 | 1.0084 | 0.9204        |
| Mean BMI              | 1.0029     | 0.9733 | 1.0333 | 0.8489        | 1.0046           | 0.9749 | 1.0352 | 0.7609        | 1.0161                          | 0.9860 | 1.0472 | 0.2961        |
| Weight gain males     | 0.9788     | 0.9647 | 0.9932 | <b>0.0041</b> | 0.9756           | 0.9610 | 0.9904 | <b>0.0013</b> | 0.9899                          | 0.9761 | 1.0038 | 0.1539        |
| Weight gain females   | 0.9733     | 0.9572 | 0.9896 | <b>0.0014</b> | 0.9726           | 0.9567 | 0.9888 | <b>0.0010</b> | 0.9799                          | 0.9649 | 0.9951 | <b>0.0098</b> |
| Smoking status        | 1.4901     | 1.1688 | 1.8997 | <b>0.0012</b> | 1.4960           | 1.1734 | 1.9072 | <b>0.0011</b> | 1.0137                          | 0.7919 | 1.2976 | 0.9137        |
| Drinking status       | 0.9963     | 0.8103 | 1.2250 | 0.9720        | 1.0012           | 0.8141 | 1.2311 | 0.9908        | 1.0972                          | 0.8916 | 1.3504 | 0.3805        |
| Exercise              | 1.1954     | 0.9620 | 1.4856 | 0.1071        | 1.1854           | 0.9535 | 1.4737 | 0.1256        | 1.1168                          | 0.8971 | 1.3902 | 0.3226        |
| Family history of HT  | 1.1568     | 0.9422 | 1.4203 | 0.1640        | 1.1505           | 0.9369 | 1.4128 | 0.1808        | 1.0278                          | 0.8359 | 1.2639 | 0.7942        |
| Family history of MI  | 0.9856     | 0.8058 | 1.2056 | 0.8881        | 0.9901           | 0.8093 | 1.2112 | 0.9232        | 1.0276                          | 0.8396 | 1.2576 | 0.7914        |
| Family history of T1D | 1.2447     | 0.9496 | 1.6314 | 0.1127        | 1.2728           | 0.9695 | 1.6710 | 0.0822        | 1.1310                          | 0.8599 | 1.4875 | 0.3784        |
| Family history of T2D | 0.9690     | 0.6779 | 1.3850 | 0.8628        | 1.0025           | 0.6987 | 1.4383 | 0.9890        | 1.0205                          | 0.7125 | 1.4615 | 0.9116        |
| Systolic BP (SBP)     | 1.0211     | 1.0137 | 1.0286 | <0.0001       | 1.0229           | 1.0153 | 1.0306 | <0.0001       | 1.0162                          | 1.0087 | 1.0239 | <0.0001       |
| Diastolic BP (DBP)    | 1.0351     | 1.0232 | 1.0470 | <0.0001       | 1.0351           | 1.0233 | 1.0471 | <0.0001       | 1.0319                          | 1.0201 | 1.0439 | <0.0001       |
| Pulse                 | 1.0423     | 1.0336 | 1.0512 | <0.0001       | 1.0421           | 1.0333 | 1.0510 | <0.0001       | 1.0197                          | 1.0107 | 1.0289 | <0.0001       |
| Mean SBP              | 1.0289     | 1.0167 | 1.0412 | <0.0001       | 1.0325           | 1.0199 | 1.0454 | <0.0001       | 1.0279                          | 1.0151 | 1.0408 | <0.0001       |

SUPPLEMENTARY DATA

|                              |        |               |        |                   |        |               |         |                   |        |               |         |                   |
|------------------------------|--------|---------------|--------|-------------------|--------|---------------|---------|-------------------|--------|---------------|---------|-------------------|
| Mean DBP                     | 1.0701 | 1.0509        | 1.0897 | <b>&lt;0.0001</b> | 1.0730 | 1.0536        | 1.0928  | <b>&lt;0.0001</b> | 1.0605 | 1.0413        | 1.0801  | <b>&lt;0.0001</b> |
| Mean Pulse                   | 1.0717 | 1.0568        | 1.0868 | <b>&lt;0.0001</b> | 1.0715 | 1.0565        | 1.0866  | <b>&lt;0.0001</b> | 1.0323 | 1.0170        | 1.0479  | <b>&lt;0.0001</b> |
| Pulse pressure               | 1.0090 | 0.9998        | 1.0184 | 0.0544            | 1.0109 | 1.0014        | 1.0204  | <b>0.0237</b>     | 1.0036 | 0.9941        | 1.0132  | 0.4518            |
| Hypertension                 | 1.5944 | 1.2575        | 2.0215 | <b>0.0001</b>     | 1.6655 | 1.3089        | 2.1194  | <b>&lt;0.0001</b> | 1.4137 | 1.1115        | 1.7981  | <b>0.0047</b>     |
| History of Hypertension      | 1.5201 | 1.2174        | 1.8981 | <b>0.0002</b>     | 1.5504 | 1.2407        | 1.9373  | <b>0.0001</b>     | 1.2427 | 0.9893        | 1.5611  | 0.0617            |
| Any ACE                      | 1.2857 | 0.9813        | 1.6845 | 0.0682            | 1.3262 | 1.0093        | 1.7426  | <b>0.0426</b>     | 1.1983 | 0.9151        | 1.5691  | 0.1882            |
| Any ARB                      | 0.9325 | 0.5569        | 1.5616 | 0.7907            | 0.9579 | 0.5711        | 1.6067  | 0.8707            | 0.8732 | 0.5210        | 1.4636  | 0.6069            |
| Any beta blockers            | 1.3328 | 0.7186        | 2.4719 | 0.3619            | 1.3867 | 0.7454        | 2.5795  | 0.3018            | 0.8779 | 0.4738        | 1.6266  | 0.6790            |
| Lipid lowering               | 0.7637 | 0.5602        | 1.0412 | 0.0882            | 0.7887 | 0.5747        | 1.0824  | 0.1416            | 0.7610 | 0.5543        | 1.0448  | 0.0912            |
| Calcium channel blockers     | 1.1400 | 0.6199        | 2.0965 | 0.6732            | 1.1943 | 0.6470        | 2.2046  | 0.5701            | 1.0262 | 0.5565        | 1.8922  | 0.9339            |
| Total cholesterol (CHL)      | 1.0078 | 1.0051        | 1.0105 | <b>&lt;0.0001</b> | 1.0081 | 1.0054        | 1.0108  | <b>&lt;0.0001</b> | 1.0034 | 1.0007        | 1.0061  | <b>0.0121</b>     |
| Triglycerides (log)          | 1.9292 | 1.6175        | 2.3009 | <b>&lt;0.0001</b> | 1.9236 | 1.6134        | 2.2934  | <b>&lt;0.0001</b> | 1.4359 | 1.1907        | 1.7315  | <b>0.0001</b>     |
| LDL cholesterol              | 1.0087 | 1.0055        | 1.0119 | <b>&lt;0.0001</b> | 1.0090 | 1.0058        | 1.0122  | <b>&lt;0.0001</b> | 1.0038 | 1.0007        | 1.0070  | <b>0.0162</b>     |
| HDL cholesterol              | 0.9892 | 0.9821        | 0.9963 | <b>0.0030</b>     | 0.9895 | 0.9824        | 0.9967  | <b>0.0042</b>     | 0.9915 | 0.9843        | 0.9987  | <b>0.0217</b>     |
| Mean CHL                     | 1.0110 | 1.0075        | 1.0146 | <b>&lt;0.0001</b> | 1.0118 | 1.0082        | 1.0154  | <b>&lt;0.0001</b> | 1.0030 | 0.9993        | 1.0067  | 0.1029            |
| Mean TRG (log)               | 2.6945 | 2.1576        | 3.3649 | <b>&lt;0.0001</b> | 2.6794 | 2.1445        | 3.3476  | <b>&lt;0.0001</b> | 1.6398 | 1.2919        | 2.0813  | <b>&lt;0.0001</b> |
| Mean LDLc                    | 1.0110 | 1.0070        | 1.0151 | <b>&lt;0.0001</b> | 1.0119 | 1.0078        | 1.0160  | <b>&lt;0.0001</b> | 1.0029 | 0.9988        | 1.0070  | 0.1633            |
| Mean HDLc                    | 0.9894 | 0.9808        | 0.9980 | <b>0.0168</b>     | 0.9899 | 0.9813        | 0.9986  | <b>0.0236</b>     | 0.9917 | 0.9829        | 1.0005  | 0.0666            |
| Duration (years)             | 1.0834 | 1.0591        | 1.1082 | <b>&lt;0.0001</b> | 1.0847 | 1.0604        | 1.1108  | <b>&lt;0.0001</b> | 1.1511 | 1.1241        | 1.1801  | <b>&lt;0.0001</b> |
| Stimulated C-peptide (< 5yr) | 0.4099 | 0.1202        | 1.3977 | 0.1541            | 0.4087 | 0.1183        | 1.4113  | 0.1570            | 0.2573 | 0.0698        | 0.9473  | <b>0.0412</b>     |
| Stimulated C-peptide (> 5)   | 0.1578 | <b>0.0029</b> | 8.5301 | 0.3644            | 0.2303 | <b>0.0042</b> | 12.3472 | 0.4698            | 0.5395 | <b>0.0084</b> | 34.6174 | 0.7713            |
| Insulin dose (per kg)        | 1.7123 | 1.2273        | 2.3890 | <b>0.0015</b>     | 1.6767 | 1.1920        | 2.3586  | <b>0.0029</b>     | 1.0199 | 0.6794        | 1.5312  | 0.9240            |
| Mean insulin dose            | 2.5244 | 1.5635        | 4.0758 | <b>&lt;0.0001</b> | 2.5498 | 1.5124        | 4.2986  | <b>&lt;0.0001</b> | 1.3225 | 0.7753        | 2.2556  | 0.3048            |
| Estimated GFR                | 1.0124 | 1.0047        | 1.0202 | <b>0.0014</b>     | 1.0134 | 1.0043        | 1.0227  | <b>0.0038</b>     | 1.0041 | 0.9962        | 1.0121  | 0.2996            |
| Any eGFR < 60                | 2.4287 | 1.2799        | 4.6086 | <b>0.0066</b>     | 2.6054 | 1.3649        | 4.9734  | <b>0.0036</b>     | 1.7484 | 0.9150        | 3.3410  | 0.0907            |
| AER                          | 1.0003 | 1.0002        | 1.0005 | <b>&lt;0.0001</b> | 1.0003 | 1.0002        | 1.0005  | <b>&lt;0.0001</b> | 1.0002 | 1.0000        | 1.0003  | <b>0.0024</b>     |

SUPPLEMENTARY DATA

|                      |        |        |        |                   |        |        |        |                   |        |        |        |                   |
|----------------------|--------|--------|--------|-------------------|--------|--------|--------|-------------------|--------|--------|--------|-------------------|
| Any Macroalbuminuria | 3.9160 | 2.8596 | 5.3627 | <b>&lt;0.0001</b> | 3.8802 | 2.8321 | 5.3161 | <b>&lt;0.0001</b> | 1.8899 | 1.3716 | 2.6040 | <b>&lt;0.0001</b> |
| Coma/Seizure         | 0.9540 | 0.8148 | 1.1169 | 0.5585            | 0.9533 | 0.8144 | 1.1159 | 0.5524            | 0.9812 | 0.8421 | 1.1432 | 0.8079            |
| Required Assistance  | 0.9368 | 0.8573 | 1.0236 | 0.1492            | 0.9355 | 0.8560 | 1.0225 | 0.1418            | 0.9756 | 0.8971 | 1.0610 | 0.5649            |
| HbA1C at baseline    | 1.3618 | 1.2907 | 1.4368 | <b>&lt;0.0001</b> | 1.3608 | 1.2892 | 1.4364 | <b>&lt;0.0001</b> | 1.0843 | 1.0189 | 1.1539 | <b>0.0107</b>     |
| HbA1c                | 1.6482 | 1.5564 | 1.7454 | <b>&lt;0.0001</b> | 1.6477 | 1.5553 | 1.7456 | <b>&lt;0.0001</b> | 1.0386 | 0.9478 | 1.1381 | 0.4163            |
| Mean HbA1C           | 2.2386 | 2.0765 | 2.4133 | <b>&lt;0.0001</b> | 2.2673 | 2.1005 | 2.4475 | <b>&lt;0.0001</b> | -      | -      | -      | -                 |

SUPPLEMENTARY DATA

**Supplementary Table S5.** Hazard ratios for CSME per unit change in each time-dependent covariate with no adjustment, adjusted for age and adjusted for age and mean HbA1c

|                       | Unadjusted |        |        |               | Adjusted for Age |        |        |               | Adjusted for Age and mean HbA1c |        |        |               |
|-----------------------|------------|--------|--------|---------------|------------------|--------|--------|---------------|---------------------------------|--------|--------|---------------|
|                       | HR         | LL     | UL     | p-value       | HR               | LL     | UL     | p-value       | HR                              | LL     | UL     | p-value       |
| Treatment group       | 1.7631     | 1.4527 | 2.1398 | <0.0001       | 1.7961           | 1.4793 | 2.1808 | <0.0001       | 0.8552                          | 0.6869 | 1.0646 | 0.1616        |
| Cohort                | 1.6517     | 1.3610 | 2.0045 | <0.0001       | 1.6383           | 1.3498 | 1.9885 | <0.0001       | 1.8580                          | 1.5291 | 2.2578 | <0.0001       |
| Sex                   | 1.3309     | 1.0991 | 1.6116 | <b>0.0034</b> | 1.3089           | 1.0804 | 1.5857 | <b>0.0059</b> | 1.3358                          | 1.1019 | 1.6195 | <b>0.0031</b> |
| Age                   | 1.0173     | 1.0036 | 1.0312 | <b>0.0128</b> | -                | -      | -      | -             | -                               | -      | -      | -             |
| Adult vs. adolescent  | 1.0412     | 0.7907 | 1.3710 | 0.7736        | 0.6978           | 0.4774 | 1.0200 | 0.0632        | 1.0395                          | 0.7075 | 1.5273 | 0.8434        |
| Weight                | 1.0065     | 1.0004 | 1.0126 | <b>0.0357</b> | 1.0058           | 0.9997 | 1.0120 | 0.0600        | 1.0074                          | 1.0013 | 1.0135 | <b>0.0161</b> |
| BMI                   | 1.0147     | 0.9936 | 1.0364 | 0.1725        | 1.0139           | 0.9928 | 1.0355 | 0.1953        | 1.0214                          | 0.9999 | 1.0433 | 0.0501        |
| Mean weight           | 1.0090     | 1.0020 | 1.0162 | <b>0.0114</b> | 1.0078           | 1.0007 | 1.0150 | <b>0.0309</b> | 1.0088                          | 1.0017 | 1.0160 | <b>0.0147</b> |
| Mean BMI              | 1.0295     | 1.0014 | 1.0585 | <b>0.0391</b> | 1.0269           | 0.9988 | 1.0559 | 0.0602        | 1.0316                          | 1.0029 | 1.0611 | <b>0.0304</b> |
| Weight gain males     | 0.9942     | 0.9814 | 1.0071 | 0.3788        | 0.9956           | 0.9823 | 1.0092 | 0.5290        | 1.0044                          | 0.9916 | 1.0173 | 0.4978        |
| Weight gain females   | 0.9851     | 0.9696 | 1.0008 | 0.0627        | 0.9864           | 0.9707 | 1.0024 | 0.0970        | 0.9926                          | 0.9772 | 1.0082 | 0.3523        |
| Smoking status        | 1.2666     | 1.0000 | 1.6043 | <b>0.0499</b> | 1.2487           | 0.9855 | 1.5823 | 0.0658        | 0.8907                          | 0.6997 | 1.1339 | 0.3475        |
| Drinking status       | 1.1236     | 0.9270 | 1.3618 | 0.2347        | 1.1104           | 0.9160 | 1.3460 | 0.2861        | 1.2150                          | 1.0017 | 1.4736 | <b>0.0479</b> |
| Exercise              | 0.9235     | 0.7276 | 1.1721 | 0.5130        | 0.9495           | 0.7474 | 1.2062 | 0.6714        | 0.9043                          | 0.7116 | 1.1491 | 0.4105        |
| Family history of HT  | 1.1240     | 0.9280 | 1.3614 | 0.2315        | 1.1349           | 0.9369 | 1.3748 | 0.1956        | 1.0751                          | 0.8872 | 1.3030 | 0.4596        |
| Family history of MI  | 1.0221     | 0.8462 | 1.2345 | 0.8204        | 1.0131           | 0.8386 | 1.2238 | 0.8925        | 1.0506                          | 0.8695 | 1.2694 | 0.6086        |
| Family history of T1D | 1.3260     | 1.0336 | 1.7010 | <b>0.0263</b> | 1.2877           | 1.0026 | 1.6538 | <b>0.0476</b> | 1.1738                          | 0.9130 | 1.5092 | 0.2111        |
| Family history of T2D | 1.1874     | 0.8692 | 1.6219 | 0.2803        | 1.1239           | 0.8203 | 1.5397 | 0.4670        | 1.1187                          | 0.8177 | 1.5306 | 0.4828        |
| Systolic BP (SBP)     | 1.0193     | 1.0122 | 1.0266 | <0.0001       | 1.0183           | 1.0110 | 1.0256 | <0.0001       | 1.0129                          | 1.0057 | 1.0201 | <b>0.0003</b> |
| Diastolic BP (DBP)    | 1.0345     | 1.0234 | 1.0457 | <0.0001       | 1.0345           | 1.0234 | 1.0457 | <0.0001       | 1.0300                          | 1.0190 | 1.0411 | <0.0001       |
| Pulse                 | 1.0275     | 1.0190 | 1.0360 | <0.0001       | 1.0281           | 1.0197 | 1.0366 | <0.0001       | 1.0123                          | 1.0036 | 1.0210 | <b>0.0050</b> |
| Mean SBP              | 1.0316     | 1.0201 | 1.0431 | <0.0001       | 1.0297           | 1.0181 | 1.0415 | <0.0001       | 1.0272                          | 1.0154 | 1.0390 | <0.0001       |

SUPPLEMENTARY DATA

|                              |        |               |             |                   |        |               |         |                   |        |               |             |                   |
|------------------------------|--------|---------------|-------------|-------------------|--------|---------------|---------|-------------------|--------|---------------|-------------|-------------------|
| Mean DBP                     | 1.0610 | 1.0432        | 1.0792      | <b>&lt;0.0001</b> | 1.0593 | 1.0413        | 1.0775  | <b>&lt;0.0001</b> | 1.0524 | 1.0344        | 1.0706      | <b>&lt;0.0001</b> |
| Mean Pulse                   | 1.0390 | 1.0259        | 1.0522      | <b>&lt;0.0001</b> | 1.0409 | 1.0278        | 1.0542  | <b>&lt;0.0001</b> | 1.0144 | 1.0012        | 1.0279      | <b>0.0324</b>     |
| Pulse pressure               | 1.0057 | 0.9967        | 1.0147      | 0.2136            | 1.0036 | 0.9945        | 1.0129  | 0.4317            | 0.9990 | 0.9899        | 1.0081      | 0.8343            |
| Hypertension                 | 1.4116 | 1.1207        | 1.7779      | <b>0.0034</b>     | 1.3594 | 1.0761        | 1.7172  | <b>0.0100</b>     | 1.2018 | 0.9526        | 1.5163      | 0.1209            |
| History of Hypertension      | 1.3913 | 1.1271        | 1.7174      | <b>0.0021</b>     | 1.3606 | 1.1006        | 1.6819  | <b>0.0044</b>     | 1.1741 | 0.9459        | 1.4572      | 0.1453            |
| Any ACE                      | 1.0385 | 0.7922        | 1.3613      | 0.7840            | 0.9955 | 0.7580        | 1.3076  | 0.9746            | 0.9583 | 0.7318        | 1.2547      | 0.7567            |
| Any ARB                      | 1.1844 | 0.7651        | 1.8336      | 0.4477            | 1.1286 | 0.7279        | 1.7500  | 0.5885            | 1.0956 | 0.7072        | 1.6975      | 0.6824            |
| Any beta blockers            | 0.7923 | 0.3720        | 1.6875      | 0.5462            | 0.7448 | 0.3492        | 1.5884  | 0.4457            | 0.6066 | 0.2850        | 1.2912      | 0.1946            |
| Lipid lowering               | 0.7332 | 0.5429        | 0.9901      | <b>0.0429</b>     | 0.6757 | 0.4981        | 0.9165  | <b>0.0117</b>     | 0.6565 | 0.4851        | 0.8884      | <b>0.0064</b>     |
| Calcium channel blockers     | 1.1925 | 0.6514        | 2.1830      | 0.5681            | 1.1320 | 0.6174        | 2.0753  | 0.6884            | 1.0180 | 0.5557        | 1.8649      | 0.9537            |
| Total cholesterol (CHL)      | 1.0095 | 1.0071        | 1.0118      | <b>&lt;0.0001</b> | 1.0093 | 1.0069        | 1.0117  | <b>&lt;0.0001</b> | 1.0052 | 1.0027        | 1.0077      | <b>&lt;0.0001</b> |
| Triglycerides (log)          | 2.0219 | 1.7186        | 2.3787      | <b>&lt;0.0001</b> | 2.0500 | 1.7401        | 2.4150  | <b>&lt;0.0001</b> | 1.6188 | 1.3634        | 1.9220      | <b>&lt;0.0001</b> |
| LDL cholesterol              | 1.0106 | 1.0077        | 1.0135      | <b>&lt;0.0001</b> | 1.0104 | 1.0074        | 1.0133  | <b>&lt;0.0001</b> | 1.0058 | 1.0028        | 1.0088      | <b>0.0001</b>     |
| HDL cholesterol              | 0.9936 | 0.9871        | 1.0001      | 0.0553            | 0.9927 | 0.9862        | 0.9992  | <b>0.0298</b>     | 0.9932 | 0.9866        | 0.9998      | <b>0.0450</b>     |
| Mean CHL                     | 1.0129 | 1.0096        | 1.0162      | <b>&lt;0.0001</b> | 1.0126 | 1.0093        | 1.0159  | <b>&lt;0.0001</b> | 1.0054 | 1.0020        | 1.0089      | <b>0.0017</b>     |
| Mean TRG (log)               | 2.4469 | 1.9863        | 3.0143      | <b>&lt;0.0001</b> | 2.5056 | 2.0339        | 3.0867  | <b>&lt;0.0001</b> | 1.7128 | 1.3746        | 2.1343      | <b>&lt;0.0001</b> |
| Mean LDLc                    | 1.0131 | 1.0094        | 1.0168      | <b>&lt;0.0001</b> | 1.0126 | 1.0089        | 1.0164  | <b>&lt;0.0001</b> | 1.0053 | 1.0015        | 1.0092      | <b>0.0060</b>     |
| Mean HDLc                    | 0.9942 | 0.9864        | 1.0021      | 0.1507            | 0.9931 | 0.9853        | 1.0009  | 0.0865            | 0.9939 | 0.9859        | 1.0018      | 0.1342            |
| Duration (years)             | 1.0604 | 1.0378        | 1.0834      | <b>&lt;0.0001</b> | 1.0591 | 1.0366        | 1.0821  | <b>&lt;0.0001</b> | 1.0977 | 1.0731        | 1.1228      | <b>&lt;0.0001</b> |
| Stimulated C-peptide (< 5yr) | 0.8315 | 0.2916        | 2.3708      | 0.7299            | 0.6999 | 0.2421        | 2.0231  | 0.5100            | 0.7517 | 0.2516        | 2.2459      | 0.6093            |
| Stimulated C-peptide (> 5yr) | 0.8017 | <b>0.0223</b> | 28.750<br>2 | 0.9036            | 0.6409 | <b>0.0173</b> | 23.6486 | 0.8090            | 1.1645 | <b>0.0309</b> | 43.776<br>5 | 0.9343            |
| Insulin dose (per kg)        | 1.7154 | 1.2281        | 2.3959      | <b>0.0015</b>     | 1.8595 | 1.3442        | 2.5723  | <b>0.0001</b>     | 1.3928 | 0.9740        | 1.9915      | 0.0693            |
| Mean insulin dose            | 1.5964 | 1.0037        | 2.5390      | <b>0.0481</b>     | 2.2658 | 1.3749        | 3.7339  | <b>0.0013</b>     | 1.5845 | 0.9615        | 2.6112      | 0.0708            |
| Estimated GFR                | 1.0073 | 1.0002        | 1.0145      | <b>0.0423</b>     | 1.0163 | 1.0076        | 1.0251  | <b>0.0002</b>     | 1.0105 | 1.0026        | 1.0184      | <b>0.0084</b>     |
| Any eGFR < 60                | 1.4415 | 0.6784        | 3.0629      | 0.3415            | 1.3547 | 0.6364        | 2.8835  | 0.4308            | 0.9510 | 0.4471        | 2.0230      | 0.8963            |
| AER                          | 1.0003 | 1.0001        | 1.0005      | <b>&lt;0.0001</b> | 1.0003 | 1.0002        | 1.0005  | <b>&lt;0.0001</b> | 1.0001 | 0.9999        | 1.0003      | 0.0546            |
| Any                          | 2.5955 | 1.8467        | 3.6480      | <b>&lt;0.0001</b> | 2.7054 | 1.9226        | 3.8069  | <b>&lt;0.0001</b> | 1.5364 | 1.0848        | 2.1761      | <b>0.0155</b>     |

SUPPLEMENTARY DATA

|                     |        |        |        |                   |        |        |        |                   |        |        |        |        |
|---------------------|--------|--------|--------|-------------------|--------|--------|--------|-------------------|--------|--------|--------|--------|
| Macroalbuminuria    |        |        |        |                   |        |        |        |                   |        |        |        |        |
| Coma/Seizure        | 0.9813 | 0.8624 | 1.1166 | 0.7750            | 0.9831 | 0.8633 | 1.1194 | 0.7971            | 1.0036 | 0.8847 | 1.1385 | 0.9545 |
| Required Assistance | 0.9516 | 0.8809 | 1.0280 | 0.2083            | 0.9539 | 0.8831 | 1.0303 | 0.2306            | 0.9861 | 0.9166 | 1.0608 | 0.7080 |
| HbA1C at baseline   | 1.2588 | 1.1942 | 1.3269 | <b>&lt;0.0001</b> | 1.2779 | 1.2109 | 1.3485 | <b>&lt;0.0001</b> | 1.0561 | 0.9926 | 1.1237 | 0.0843 |
| HbA1c               | 1.4907 | 1.4089 | 1.5772 | <b>&lt;0.0001</b> | 1.5095 | 1.4254 | 1.5985 | <b>&lt;0.0001</b> | 1.0295 | 0.9392 | 1.1284 | 0.5340 |
| Mean HbA1C          | 1.8379 | 1.7134 | 1.9715 | <b>&lt;0.0001</b> | 1.8989 | 1.7681 | 2.0392 | <b>&lt;0.0001</b> | -      | -      | -      | -      |

SUPPLEMENTARY DATA

**Supplementary Table S6.** Hazard ratios for Ocular Surgery per unit change in each time-dependent covariate with no adjustment, adjusted for age and adjusted for age and mean HbA1c

|                       | Unadjusted |        |        |                    | Adjusted for Age |        |        |                    | Adjusted for Age and mean HbA1c |        |        |                    |
|-----------------------|------------|--------|--------|--------------------|------------------|--------|--------|--------------------|---------------------------------|--------|--------|--------------------|
|                       | HR         | LL     | UL     | p-value            | HR               | LL     | UL     | p-value            | HR                              | LL     | UL     | p-value            |
| Treatment group       | 1.6536     | 1.3019 | 2.1004 | <0.0001<br><0.0001 | 1.7533           | 1.3789 | 2.2293 | <0.0001<br><0.0001 | 1.0596                          | 0.8212 | 1.3672 | 0.6560             |
| Cohort                | 1.6083     | 1.2599 | 2.0529 | <b>0.0001</b>      | 1.5722           | 1.2315 | 2.0071 | <b>0.0002</b>      | 1.7128                          | 1.3407 | 2.1883 | <0.0001<br><0.0001 |
| Sex                   | 0.8171     | 0.6461 | 1.0333 | 0.0917             | 0.7794           | 0.6161 | 0.9861 | <b>0.0378</b>      | 0.7738                          | 0.6117 | 0.9788 | <b>0.0325</b>      |
| Age                   | 1.0484     | 1.0303 | 1.0669 | <0.0001<br><0.0001 | -                | -      | -      | -                  | -                               | -      | -      | -                  |
| Adult vs. adolescent  | 1.1492     | 0.8110 | 1.6283 | 0.4341             | 0.4018           | 0.2452 | 0.6583 | <b>0.0002</b>      | 0.5804                          | 0.3525 | 0.9555 | <b>0.0324</b>      |
| Weight                | 0.9991     | 0.9924 | 1.0059 | 0.8090             | 0.9981           | 0.9914 | 1.0049 | 0.6007             | 0.9975                          | 0.9907 | 1.0042 | 0.4696             |
| BMI                   | 1.0049     | 0.9825 | 1.0279 | 0.6660             | 1.0043           | 0.9819 | 1.0272 | 0.7057             | 1.0036                          | 0.9808 | 1.0269 | 0.7565             |
| Mean weight           | 0.9999     | 0.9917 | 1.0082 | 0.9868             | 0.9971           | 0.9889 | 1.0054 | 0.5045             | 0.9963                          | 0.9881 | 1.0046 | 0.3929             |
| Mean BMI              | 1.0138     | 0.9831 | 1.0455 | 0.3809             | 1.0094           | 0.9787 | 1.0410 | 0.5512             | 1.0062                          | 0.9750 | 1.0383 | 0.6984             |
| Weight gain males     | 0.9890     | 0.9746 | 1.0035 | 0.1377             | 0.9959           | 0.9810 | 1.0110 | 0.5964             | 0.9993                          | 0.9849 | 1.0140 | 0.9315             |
| Weight gain females   | 0.9906     | 0.9771 | 1.0042 | 0.1771             | 0.9929           | 0.9790 | 1.0070 | 0.3245             | 0.9951                          | 0.9816 | 1.0088 | 0.4891             |
| Smoking status        | 1.6183     | 1.2057 | 2.1721 | <b>0.0013</b>      | 1.6511           | 1.2297 | 2.2169 | <b>0.0008</b>      | 1.2335                          | 0.9141 | 1.6645 | 0.1698             |
| Drinking status       | 0.8088     | 0.6358 | 1.0288 | 0.0839             | 0.7781           | 0.6114 | 0.9903 | <b>0.0414</b>      | 0.8577                          | 0.6734 | 1.0925 | 0.2138             |
| Exercise              | 0.8249     | 0.6189 | 1.0994 | 0.1891             | 0.8756           | 0.6566 | 1.1677 | 0.3659             | 0.8459                          | 0.6343 | 1.1281 | 0.2546             |
| Family history of HT  | 1.2094     | 0.9521 | 1.5361 | 0.1191             | 1.2307           | 0.9689 | 1.5633 | 0.0889             | 1.1462                          | 0.9014 | 1.4576 | 0.2654             |
| Family history of MI  | 1.0771     | 0.8521 | 1.3617 | 0.5341             | 1.0491           | 0.8298 | 1.3265 | 0.6882             | 1.0680                          | 0.8445 | 1.3506 | 0.5824             |
| Family history of T1D | 1.3020     | 0.9565 | 1.7723 | 0.0933             | 1.1817           | 0.8665 | 1.6114 | 0.2914             | 1.1600                          | 0.8495 | 1.5840 | 0.3502             |
| Family history of T2D | 1.4193     | 0.9867 | 2.0414 | 0.0590             | 1.2411           | 0.8607 | 1.7896 | 0.2473             | 1.2426                          | 0.8631 | 1.7888 | 0.2426             |
| Systolic BP (SBP)     | 1.0161     | 1.0085 | 1.0238 | <0.0001<br><0.0001 | 1.0125           | 1.0047 | 1.0203 | <b>0.0015</b>      | 1.0046                          | 0.9970 | 1.0123 | 0.2268             |
| Diastolic BP          | 0.9879     | 0.9749 | 1.0010 | 0.0719             | 0.9913           | 0.9782 | 1.0045 | 0.1974             | 0.9893                          | 0.9766 | 1.0022 | 0.1053             |

SUPPLEMENTARY DATA

|                              |        |        |        |                    |        |        |         |                    |        |        |        |                    |
|------------------------------|--------|--------|--------|--------------------|--------|--------|---------|--------------------|--------|--------|--------|--------------------|
| (DBP)                        |        |        |        |                    |        |        |         |                    |        |        |        |                    |
| Pulse                        | 1.0293 | 1.0189 | 1.0397 | <0.0001<br><0.0001 | 1.0336 | 1.0232 | 1.0441  | <0.0001<br><0.0001 | 1.0157 | 1.0049 | 1.0267 | <b>0.0042</b>      |
| Mean SBP                     | 1.0466 | 1.0323 | 1.0610 | <0.0001<br><0.0001 | 1.0380 | 1.0233 | 1.0529  | <0.0001<br><0.0001 | 1.0261 | 1.0117 | 1.0408 | <b>0.0003</b>      |
| Mean DBP                     | 1.0394 | 1.0164 | 1.0629 | <b>0.0006</b>      | 1.0358 | 1.0127 | 1.0595  | <b>0.0022</b>      | 1.0213 | 0.9987 | 1.0444 | 0.0647             |
| Mean Pulse                   | 1.0737 | 1.0552 | 1.0925 | <0.0001<br><0.0001 | 1.0826 | 1.0638 | 1.1018  | <0.0001<br><0.0001 | 1.0448 | 1.0253 | 1.0646 | <0.0001<br><0.0001 |
| Pulse pressure               | 1.0288 | 1.0200 | 1.0377 | <0.0001<br><0.0001 | 1.0233 | 1.0140 | 1.0327  | <0.0001<br><0.0001 | 1.0132 | 1.0038 | 1.0227 | <b>0.0055</b>      |
| Hypertension                 | 1.9509 | 1.4977 | 2.5411 | <0.0001<br><0.0001 | 1.7248 | 1.3167 | 2.2595  | <0.0001<br><0.0001 | 1.4281 | 1.0931 | 1.8659 | <b>0.0089</b>      |
| History of Hypertension      | 2.2574 | 1.6127 | 3.1599 | <0.0001<br><0.0001 | 2.0549 | 1.4633 | 2.8858  | <0.0001<br><0.0001 | 1.6208 | 1.1512 | 2.2820 | <b>0.0056</b>      |
| Any ACE                      | 1.6786 | 1.3154 | 2.1419 | <0.0001<br><0.0001 | 1.5403 | 1.2046 | 1.9697  | <b>0.0005</b>      | 1.4008 | 1.0974 | 1.7879 | <b>0.0067</b>      |
| Any ARB                      | 1.4221 | 1.0181 | 1.9864 | <b>0.0388</b>      | 1.2907 | 0.9226 | 1.8057  | 0.1362             | 1.2629 | 0.9044 | 1.7636 | 0.1705             |
| Any beta blockers            | 2.4289 | 1.7502 | 3.3706 | <0.0001            | 2.1244 | 1.5244 | 2.9606  | <0.0001            | 1.5584 | 1.1182 | 2.1721 | <b>0.0088</b>      |
| Lipid lowering               | 1.3125 | 1.0143 | 1.6983 | <b>0.0386</b>      | 1.0866 | 0.8320 | 1.4192  | 0.5416             | 1.0300 | 0.7881 | 1.3461 | 0.8282             |
| Calcium channel blockers     | 2.0506 | 1.4257 | 2.9495 | <b>0.0001</b>      | 1.7200 | 1.1871 | 2.4920  | <b>0.0041</b>      | 1.5800 | 1.0937 | 2.2827 | <b>0.0148</b>      |
| Total cholesterol (CHL)      | 1.0018 | 0.9986 | 1.0051 | 0.2473             | 1.0019 | 0.9987 | 1.0051  | 0.2295             | 0.9991 | 0.9959 | 1.0023 | 0.5986             |
| Triglycerides (log)          | 1.5603 | 1.2681 | 1.9197 | <0.0001            | 1.5799 | 1.2784 | 1.9523  | <0.0001            | 1.2309 | 0.9846 | 1.5387 | 0.0680             |
| LDL cholesterol              | 0.9998 | 0.9959 | 1.0038 | 0.9594             | 1.0004 | 0.9964 | 1.0044  | 0.8296             | 0.9969 | 0.9931 | 1.0008 | 0.1276             |
| HDL cholesterol              | 0.9983 | 0.9915 | 1.0052 | 0.6454             | 0.9968 | 0.9900 | 1.0037  | 0.3765             | 0.9996 | 0.9926 | 1.0066 | 0.9139             |
| Mean CHL                     | 1.0069 | 1.0023 | 1.0115 | <b>0.0028</b>      | 1.0051 | 1.0005 | 1.0098  | <b>0.0292</b>      | 0.9970 | 0.9923 | 1.0018 | 0.2274             |
| Mean TRG (log)               | 1.9646 | 1.5064 | 2.5620 | <0.0001            | 2.0265 | 1.5538 | 2.6430  | <0.0001            | 1.3805 | 1.0421 | 1.8287 | <b>0.0245</b>      |
| Mean LDLc                    | 1.0048 | 0.9996 | 1.0101 | 0.0696             | 1.0031 | 0.9978 | 1.0085  | 0.2458             | 0.9946 | 0.9892 | 1.0000 | 0.0508             |
| Mean HDLc                    | 0.9973 | 0.9879 | 1.0067 | 0.5798             | 0.9945 | 0.9852 | 1.0038  | 0.2497             | 0.9964 | 0.9868 | 1.0061 | 0.4688             |
| Duration (years)             | 1.0654 | 1.0378 | 1.0938 | <0.0001            | 1.0616 | 1.0341 | 1.0899  | <0.0001            | 1.0990 | 1.0680 | 1.1295 | <0.0001            |
| Stimulated C-peptide (< 5yr) | 0.4572 | 0.1151 | 1.8162 | 0.2661             | 0.3489 | 0.0859 | 1.4161  | 0.1407             | 0.2661 | 0.0636 | 1.1123 | 0.0696             |
| Stimulated C-                | 0.2104 | 0.0021 | 20.307 | 0.5037             | 0.1195 | 0.0011 | 12.0846 | 0.3671             | 0.1695 | 0.0018 | 15.875 | 0.4434             |



SUPPLEMENTARY DATA

| peptide (> 5)         |        |        | 3      |                   |        |        |        |                   |        | 2      |        |                   |
|-----------------------|--------|--------|--------|-------------------|--------|--------|--------|-------------------|--------|--------|--------|-------------------|
| Insulin dose (per kg) | 1.3309 | 0.9804 | 1.8066 | 0.0667            | 1.3517 | 1.0064 | 1.8153 | <b>0.0451</b>     | 1.1035 | 0.7357 | 1.6549 | 0.6338            |
| Mean insulin dose     | 2.3135 | 1.2398 | 4.3168 | <b>0.0083</b>     | 3.9979 | 2.1385 | 7.4741 | <b>&lt;0.0001</b> | 2.2370 | 1.1537 | 4.3375 | <b>0.0171</b>     |
| Estimated GFR         | 0.9823 | 0.9770 | 0.9877 | <b>&lt;0.0001</b> | 0.9855 | 0.9795 | 0.9916 | <b>&lt;0.0001</b> | 0.9936 | 0.9881 | 0.9991 | <b>0.0241</b>     |
| Any eGFR < 60         | 3.4501 | 2.4162 | 4.9264 | <b>&lt;0.0001</b> | 2.8832 | 2.0003 | 4.1557 | <b>&lt;0.0001</b> | 1.8229 | 1.2629 | 2.6312 | <b>0.0013</b>     |
| AER                   | 1.0002 | 1.0001 | 1.0003 | <b>&lt;0.0001</b> | 1.0002 | 1.0002 | 1.0003 | <b>&lt;0.0001</b> | 1.0001 | 1.0000 | 1.0002 | <b>&lt;0.0001</b> |
| Any Macroalbuminuria  | 3.4011 | 2.5620 | 4.5150 | <b>&lt;0.0001</b> | 3.5899 | 2.7029 | 4.7681 | <b>&lt;0.0001</b> | 1.7934 | 1.3185 | 2.4393 | <b>0.0001</b>     |
| Coma/Seizure          | 1.0336 | 0.9497 | 1.1250 | 0.4431            | 1.0370 | 0.9505 | 1.1314 | 0.4125            | 1.0321 | 0.9344 | 1.1400 | 0.5332            |
| Required Assistance   | 0.9948 | 0.9346 | 1.0590 | 0.8720            | 0.9976 | 0.9368 | 1.0623 | 0.9410            | 0.9970 | 0.9364 | 1.0615 | 0.9253            |
| HbA1C at baseline     | 1.2752 | 1.1946 | 1.3612 | <b>&lt;0.0001</b> | 1.3131 | 1.2284 | 1.4036 | <b>&lt;0.0001</b> | 1.1129 | 1.0329 | 1.1991 | <b>0.0049</b>     |
| HbA1c                 | 1.2684 | 1.1733 | 1.3713 | <b>&lt;0.0001</b> | 1.3103 | 1.2080 | 1.4211 | <b>&lt;0.0001</b> | 0.8153 | 0.7307 | 0.9097 | <b>0.0002</b>     |
| Mean HbA1C            | 1.8964 | 1.7230 | 2.0873 | <b>&lt;0.0001</b> | 2.0502 | 1.8529 | 2.2686 | <b>&lt;0.0001</b> | -      | -      | -      | -                 |

SUPPLEMENTARY DATA

**Supplementary Figure S1.** Kaplan-Meier event-free (survival) curves (lines) and 95% CIs (shaded areas) for PDR (red solid line), CSME (green dashed line) and Ocular Surgery (blue dotted line), with number of subjects at risk for each at baseline and 10, 20, 25 and 30 years of follow-up. The number at risk beyond 25 years declines as a function of staggered entry into the study from 1983 to 1989.

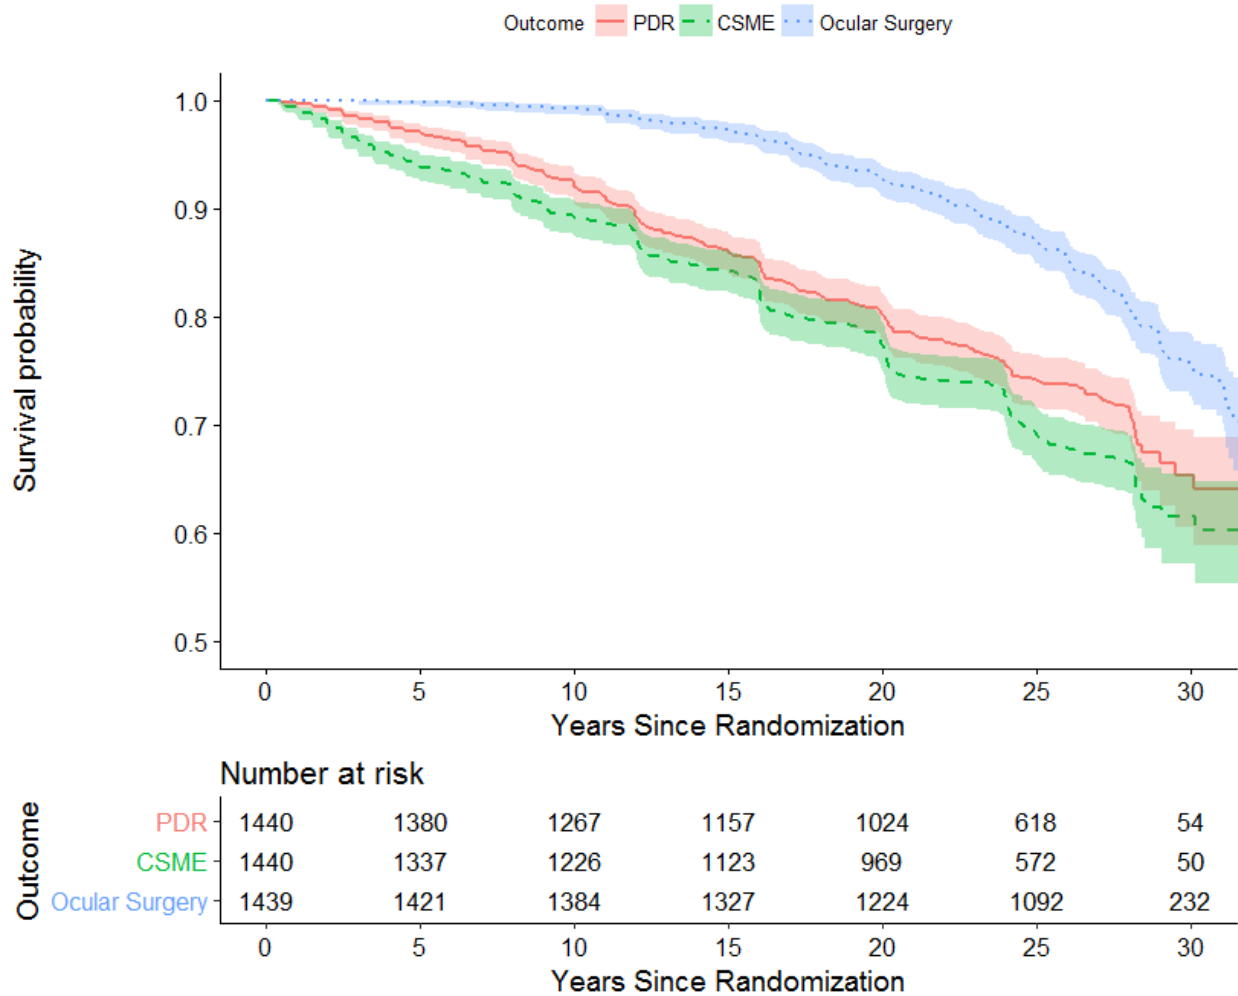

Supplement: dc182308supplementarydata.pdf [file dc182308supplementarydata.pdf]
